# Supplementary material for: Tertiary lymphoid structures-driven immune infiltration patterns and their association with survival in neuroblastoma
Source: PeerJ. 2025 Jul 22;13:e19767. doi: 10.7717/peerj.19767 (PMC12292307; doi:10.7717/peerj.19767)
Supplement: Supplemental Information 8 [file peerj-13-19767-s008.xlsx]

## Sheet: 5y
Well	Fluor	Target	Content	Sample	Biological Set Name	Cq	Cq Mean	Cq Std. Dev		Well	Fluor	Target	Content	Sample	Biological Set Name	Cq	Cq Mean	Cq Std. Dev
A01	SYBR	ccl2-1	Unkn	w1		35.5041	35.5041	0		G01	SYBR	gapdh	Unkn	w1		22.2377	22.2377	0
A02	SYBR	ccl2-2	Unkn	w2		29.0548	29.0548	0		G02	SYBR	gapdh	Unkn	w2		18.8037	18.8037	0
A03	SYBR	ccl2-3	Unkn	w3		30.2546	30.2546	0		G03	SYBR	gapdh	Unkn	w3		22.3759	22.3759	0
A04	SYBR	ccl4-1	Unkn	w4		29.4312	29.4312	0		G04	SYBR	gapdh	Unkn	w4		19.0088	19.0088	0
A05	SYBR	ccl4-2	Unkn	w5		31.1099	31.1099	0		G05	SYBR	gapdh	Unkn	w5		20.923	20.923	0
A06	SYBR	ccl4-3	Unkn	w6		30.4646	30.4646	0		G06	SYBR	gapdh	Unkn	w6		20.7034	20.7034	0
A07	SYBR	ccl21-1	Unkn	w7		30.9234	30.9234	0		G07	SYBR	gapdh	Unkn	w7		20.6437	20.6437	0
A08	SYBR	ccl21-2	Unkn	w8		32.7922	32.7922	0		G08	SYBR	gapdh	Unkn	w8		23.3451	23.3451	0
A09	SYBR	ccl21-3	Unkn	w9		31.8515	31.8515	0		G09	SYBR	gapdh	Unkn	w9		23.7397	23.7397	0
A10	SYBR	cxcr3-1	Unkn	w10		31.789	31.789	0		G10	SYBR	gapdh	Unkn	w10		18.773	18.773	0
B01	SYBR	cxcr3-2	Unkn	w1		36.1301	36.1301	0		H01	SYBR	gapdh	Unkn	w1		37.114	37.114	0
B02	SYBR	cxcr3-3	Unkn	w2		29.406	29.406	0		H02	SYBR	gapdh	Unkn	w2		18.5883	18.5883	0
B03	SYBR	cd200-1	Unkn	w3		32.1638	32.1638	0		H03	SYBR	gapdh	Unkn	w3		22.2105	22.2105	0
B04	SYBR	cd200-2	Unkn	w4		29.7732	29.7732	0		H04	SYBR	gapdh	Unkn	w4		19.0821	19.0821	0
B05	SYBR	cd200-3	Unkn	w5		31.3241	31.3241	0		H05	SYBR	gapdh	Unkn	w5		21.0326	21.0326	0
B06	SYBR	IGSF6-1	Unkn	w6		30.8754	30.8754	0		H06	SYBR	gapdh	Unkn	w6		21.0509	21.0509	0
B07	SYBR	IGSF6-2	Unkn	w7		31.0848	31.0848	0		H07	SYBR	gapdh	Unkn	w7		20.5866	20.5866	0
B08	SYBR	IGSF6-3	Unkn	w8		32.4137	32.4137	0		H08	SYBR	gapdh	Unkn	w8		23.2929	23.2929	0

## Sheet: be2
	Well	Fluor	Target	Content	Sample	Biological Set Name	Cq	Cq Mean	Cq Std. Dev		Well	Fluor	Target	Content	Sample	Biological Set Name	Cq	Cq Mean	Cq Std. Dev
	A01	SYBR	ccl2-1	Unkn	w1		36.5041	36.5041	0		G01	SYBR	gapdh	Unkn	w1		22.2377	22.2377	0
	A02	SYBR	ccl2-2	Unkn	w2		30.0548	30.0548	0		G02	SYBR	gapdh	Unkn	w2		18.8037	18.8037	0
	A03	SYBR	ccl2-3	Unkn	w3		32.2546	32.2546	0		G03	SYBR	gapdh	Unkn	w3		22.3759	22.3759	0
	A04	SYBR	ccl4-1	Unkn	w4		30.4312	30.4312	0		G04	SYBR	gapdh	Unkn	w4		19.0088	19.0088	0
	A05	SYBR	ccl4-2	Unkn	w5		34.1099	34.1099	0		G05	SYBR	gapdh	Unkn	w5		20.923	20.923	0
	A06	SYBR	ccl4-3	Unkn	w6		30.4646	30.4646	0		G06	SYBR	gapdh	Unkn	w6		20.7034	20.7034	0
	A07	SYBR	ccl21-1	Unkn	w7		30.9234	30.9234	0		G07	SYBR	gapdh	Unkn	w7		20.6437	20.6437	0
	A08	SYBR	ccl21-2	Unkn	w8		29.7922	29.7922	0		G08	SYBR	gapdh	Unkn	w8		23.3451	23.3451	0
	A09	SYBR	ccl21-3	Unkn	w9		30.8515	30.8515	0		G09	SYBR	gapdh	Unkn	w9		23.7397	23.7397	0
	A10	SYBR	cxcr3-1	Unkn	w10		32.789	32.789	0		G10	SYBR	gapdh	Unkn	w10		18.773	18.773	0
	B01	SYBR	cxcr3-2	Unkn	w1		37.1301	37.1301	0		H01	SYBR	gapdh	Unkn	w1		37.114	37.114	0
	B02	SYBR	cxcr3-3	Unkn	w2		31.406	31.406	0		H02	SYBR	gapdh	Unkn	w2		18.5883	18.5883	0
	B03	SYBR	cd200-1	Unkn	w3		32.1638	32.1638	0		H03	SYBR	gapdh	Unkn	w3		22.2105	22.2105	0
	B04	SYBR	cd200-2	Unkn	w4		31.7732	31.7732	0		H04	SYBR	gapdh	Unkn	w4		19.0821	19.0821	0
	B05	SYBR	cd200-3	Unkn	w5		34.3241	34.3241	0		H05	SYBR	gapdh	Unkn	w5		21.0326	21.0326	0
	B06	SYBR	IGSF6-1	Unkn	w6		30.8754	30.8754	0		H06	SYBR	gapdh	Unkn	w6		21.0509	21.0509	0
	B07	SYBR	IGSF6-2	Unkn	w7		31.0848	31.0848	0		H07	SYBR	gapdh	Unkn	w7		20.5866	20.5866	0
	B08	SYBR	IGSF6-3	Unkn	w8		29.4137	29.4137	0		H08	SYBR	gapdh	Unkn	w8		23.2929	23.2929	0
