# Supplementary material for: Tertiary lymphoid structures-driven immune infiltration patterns and their association with survival in neuroblastoma
Source: PeerJ. 2025 Jul 22;13:e19767. doi: 10.7717/peerj.19767 (PMC12292307; doi:10.7717/peerj.19767)
Supplement: Supplemental Information 9 [file peerj-13-19767-s009.xls]

## Sheet: Sheet1
ITEM TO CHECK	IMPORTANCE	CHECKLIST
EXPERIMENTAL DESIGN
Definition of experimental and control groups	E	Page8 209-211
Number within each group	E	Page8 209-211,221-222
Assay carried out by core lab or investigator's lab?	D
Acknowledgement of authors' contributions	D
SAMPLE
Description	E	Page8 207-208
Volume/mass of sample processed	D
Microdissection or macrodissection	E	Microdissection
Processing procedure	E	Page8 211-216
If frozen - how and how quickly?	E	Page8 211-216
If fixed - with what, how quickly?	E	Page8 211-216
Sample storage conditions and duration (especially for FFPE samples)	E	‘-20°CStore briefly for 1weeks
NUCLEIC ACID EXTRACTION
Procedure and/or instrumentation	E	Page9 216
Name of kit and details of any modifications	E	Page9 216-226
Source of additional reagents used	D
Details of DNase or RNAse treatment	E	Page9 216-226
Contamination assessment (DNA or RNA)	E	Page9 216-226
Nucleic acid quantification	E	Page9 230-231
Instrument and method	E	Page9.NanoDrop spectrophotometer,
Purity (A260/A280)	D
Yield	D
RNA integrity method/instrument	E	Page9
RIN/RQI or Cq of 3' and 5' transcripts	E	Page9
Electrophoresis traces	D
Inhibition testing (Cq dilutions, spike or other)	E	Page9
REVERSE TRANSCRIPTION
Complete reaction conditions	E	Page9
Amount of RNA and reaction volume	E	Page9 231
Priming oligonucleotide (if using GSP) and concentration	E	Page9 231-235
Reverse transcriptase and concentration	E	Page9 231-235
Temperature and time	E	Page9 231-235
Manufacturer of reagents and catalogue numbers	D
Cqs with and without RT	D*
Storage conditions of cDNA	D
qPCR TARGET INFORMATION
If multiplex, efficiency and LOD of each assay.	E	Page8-9
Sequence accession number	E	Page8 207-208
Location of amplicon	D
Amplicon length	E	Page8-9
In silico specificity screen (BLAST, etc)	E	Page8-9
Pseudogenes, retropseudogenes or other homologs?	D
Sequence alignment	D
Secondary structure analysis of amplicon	D
Location of each primer by exon or intron (if applicable)	E	inapplicability
What splice variants are targeted?	E	inapplicability
qPCR OLIGONUCLEOTIDES
Primer sequences	E	Page8 207
RTPrimerDB Identification Number	D
Probe sequences	D**
Location and identity of any modifications	E	Page8-9
Manufacturer of oligonucleotides	D
Purification method	D
qPCR PROTOCOL
Complete reaction conditions	E	Page8-9
Reaction volume and amount of cDNA/DNA	E	Page8-9
Primer, (probe), Mg++ and dNTP concentrations	E	Page8-9
Polymerase identity and concentration	E	Page8-9
Buffer/kit identity and manufacturer	E	Page8-9
Exact chemical constitution of the buffer	D
Additives (SYBR Green I, DMSO, etc.)	E	Page8-9 SYBR Green I
Manufacturer of plates/tubes and catalog number	D
Complete thermocycling parameters	E	Page8-9
Reaction setup (manual/robotic)	D
Manufacturer of qPCR instrument	E	Page9 Bio-Rad
qPCR VALIDATION
Evidence of optimisation (from gradients)	D
Specificity (gel, sequence, melt, or digest)	E	Page8-9
For SYBR Green I, Cq of the NTC	E	Page9
Standard curves with slope and y-intercept	E	Page9
PCR efficiency calculated from slope	E	Page9
Confidence interval for PCR efficiency or standard error	D
r2 of standard curve	E	Page9
Linear dynamic range	E	Page9
Cq variation at lower limit	E	Page9
Confidence intervals throughout range	D
Evidence for limit of detection	E	Page9
If multiplex, efficiency and LOD of each assay.	E	Page9
DATA ANALYSIS
qPCR analysis program (source, version)	E	Page9 Cq method determination
Cq method determination	E	Page9
Outlier identification and disposition	E	Page9 More than 0.5-1 ct values between repeated samples
Results of NTCs	E
Justification of number and choice of reference genes	E	Page8 GAPDH
Description of normalisation method	E	Page9 ct difference was obtained relative to internal reference gene
Number and concordance of biological replicates	D
Number and stage (RT or qPCR) of technical replicates	E	Page9 40cycle
Repeatability (intra-assay variation)	E	Page9
Reproducibility (inter-assay variation, %CV)	D
Power analysis	D
Statistical methods for result significance	E	page11 277-282
Software (source, version)	E	page11 282-283
Cq or raw data submission using RDML	D
Table 1. MIQE checklist for authors, reviewers and editors. All essential information (E) must be submitted with the manuscript. Desirable
information (D) should be submitted if available. If using primers obtained from RTPrimerDB, information on qPCR target, oligonucleotides,
protocols and validation is available from that source.
*: Assessing the absence of DNA using a no RT assay is essential when first extracting RNA. Once the sample has been validated as
RDNA-free, inclusion of a no-RT control is desirable, but no longer essential.
**: Disclosure of the probe sequence is highly desirable and strongly encouraged. However, since not all commercial pre-designed assay
vendors provide this information, it cannot be an essential requirement. Use of such assays is advised against.
